# Supplementary material for: O-GlcNAc-mediated interaction between VER2 and TaGRP2 elicits TaVRN1 mRNA accumulation during vernalization in winter wheat
Source: PubMed Central journal article supplement — Nat Commun. 2014 Aug 5;5:4572. doi: 10.1038/ncomms5572 (PMC4143922; doi:10.1038/ncomms5572), 2014-08-05
Supplement: ncomms5572-s1.pdf [file ncomms5572-s1.pdf]

## Supplementary Figures

### Supplementary Figure 1

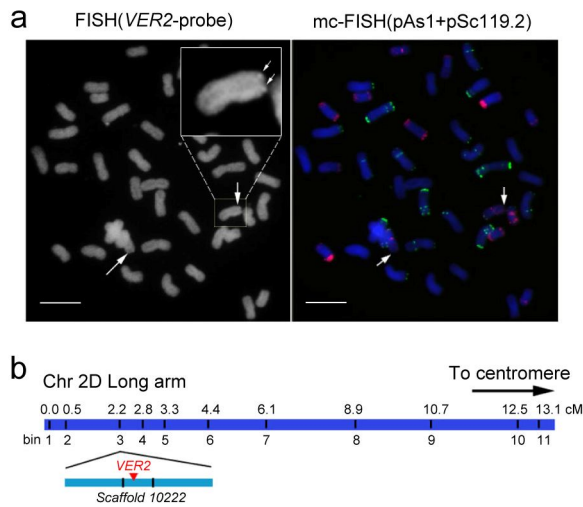

### Supplementary Fig. 1 Chromosome localization of *VER2*

(a) Fluorescence *in situ* hybridization (FISH) shows *VER2* gene localized on chromosome 2D. Arrows indicate the hybridization signal by *VER2* probe, enlarged chromosome with *VER2* signal is shown in the embedded white box; multicolor (mc)-FISH was used to pattern the individual chromosomes, pAs1 for red, pSc119.2 for green, DAPI staining the chromosomes show blue. Bar = 10  $\mu$ m. (b) Sequence screening on the genome to show localization of *VER2* on the long arm of chromosome 2D. The upper numbers show the genetic distance along the chromosome 2, cM (centimorgan); the lower numbers show the bin number, data resource is from recent publication<sup>1</sup>.



### Supplementary Figure 3

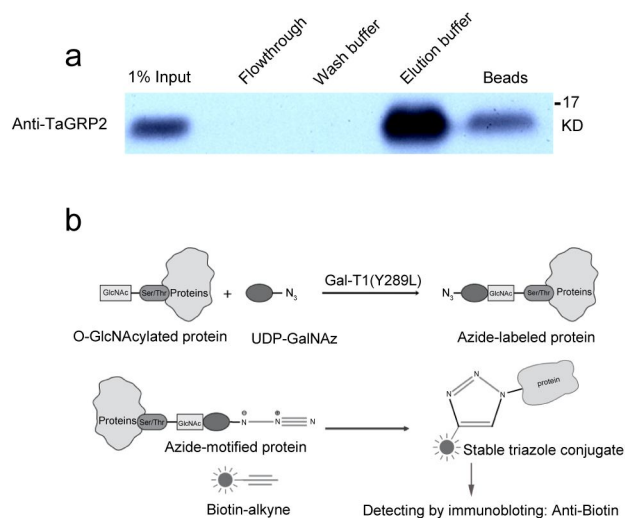

### Supplementary Fig. 3 Purification of endogenous TaGRP2 and labeling with UDP-GalNAz

(a) Affinity purification of endogenous TaGRP2 from vernalized (V28) wheat plumule using a TaGRP2 specific antibody. “Beads” stands for un-eluted sample after elution.

(b) Schematic diagram indicates the labeling of the GlcNAc side chain with UDP-GalNAz by Gal-T1 (Y289L) enzyme and detection with biotin antibody, modified from Invitrogen manual for Click-iT™ O-GlcNAc Enzymatic Labeling System.

### Supplementary Figure 4

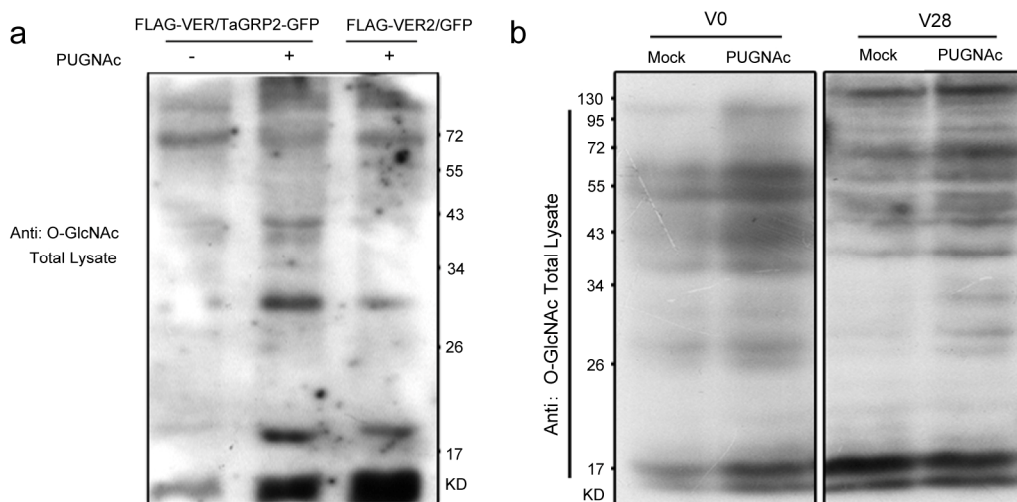

Supplementary Fig. 4 PUGNAc treatment increases total protein O-GlcNAc modification level in protoplasts of wheat plumules (a) and tobacco leaves (b).

## Supplementary Figure 5

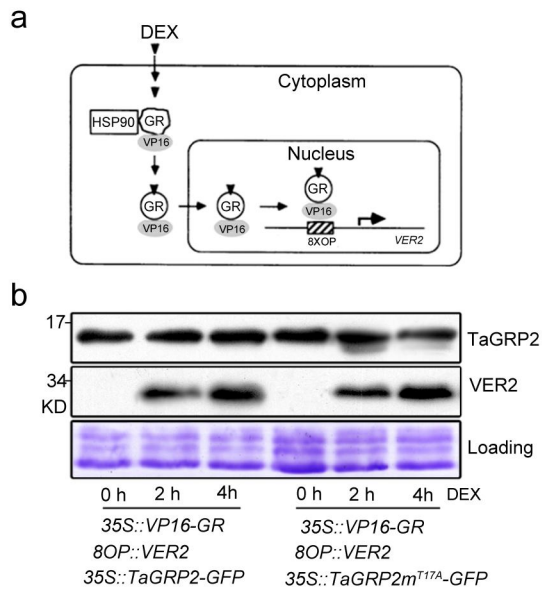

### Supplementary Fig. 5 DEX inducible expression of VER2

(a) Schematic diagram of the Dexamethasone (DEX) inducible expression system. Modified from previous publication<sup>2</sup>. (b) Immunoblot analysis of DEX induced expression of VER2. Total protoplast lysate was used in this analysis, TaGRP2<sup>T17A</sup> did not interfere the detection by TaGRP2 antibody.

## Supplementary Figure 6

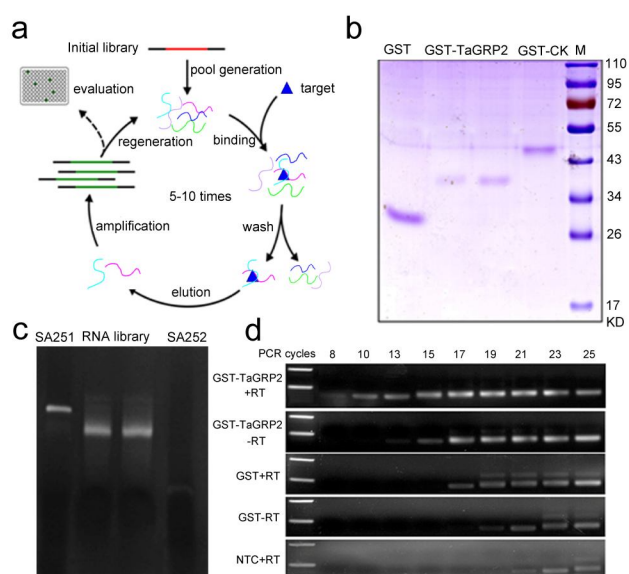

### Supplementary Fig. 6 SELEX screen for the RNA binding preference of TaGRP2

(a) Schematic diagram of the SELEX screening process, modified from online resource of <http://www.chem-station.com/chemglossary/images/SELEX.jpg>. (b) *In vitro* expression and purification of GST-TaGRP2 protein. GST-CK, a GST-tagged protein served as positive control for the *in vitro* expression and purification. (c) PAGE-gel electrophoresis analysis of the RNA library. SA251, SA252 served as marker for the proper sizing of the RNA pools. (d) Identification of the proper cycle numbers to be used for PCR amplification for next round screening. RT: reverse transcriptase; NTC: no template control.

## Supplementary Figure 7

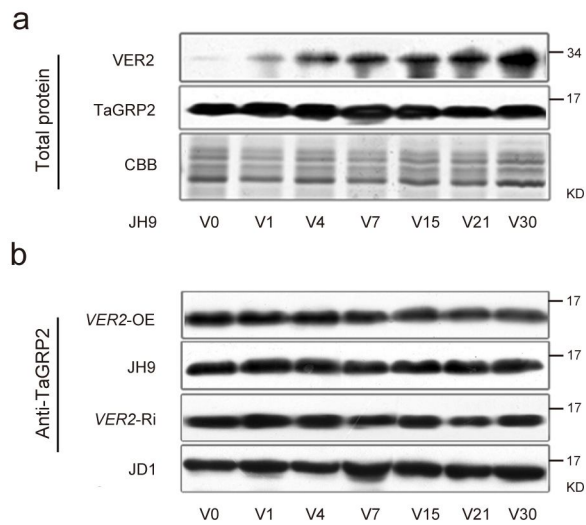

### Supplementary Fig. 7 Total protein level of TaGRP2 in response to vernalization in JH9 (Jinghua 9) and JD1 (Jingdong 1), *VER2*-OE and *VER2*-Ri plants

(a) Total protein level of TaGRP2 and VER2 during the course of vernalization in JH9. Different 4°C cold treatment time (0 day to 30 days) as indicated as V0-V30. (b) Total protein level of TaGRP2 during the course of vernalization in JH9, JD1, *VER2*-Ri and *VER2*-OE plants.

## Supplementary Figure 8

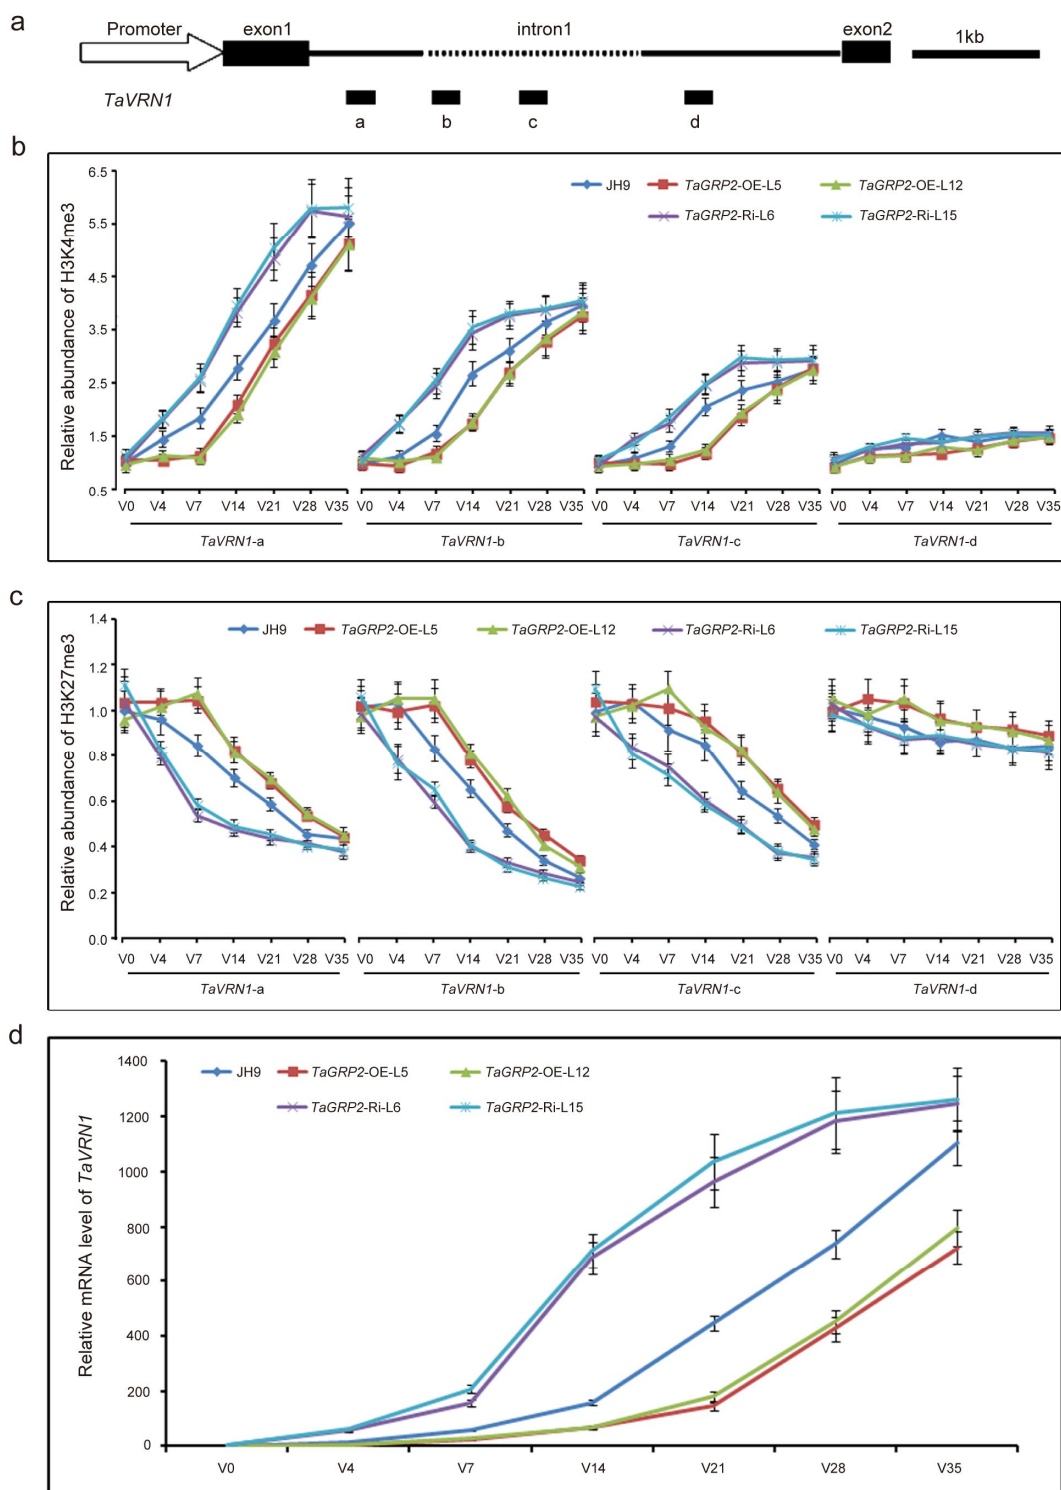

**Supplementary Fig. 8 TaGRP2 delays histone modification switch in the first intron of *TaVRN1* during cold exposure.**

(a) Schematic diagram of the *TaVRN1* gene structure. PCR amplification fragments for ChIP are indicated. (b,c) Histone modification changes (H3K4me3 and H3K27me3) at *TaVRN1* chromatin loci during the course of vernalization in *TaGRP2-OE*,

*TaGRP2-RNAi* and JH9. The regions amplified after ChIP are shown in (a). (d) *TaVRN1* transcript amount during the course of vernalization in *TaGRP2-OE*, *TaGRP2-RNAi* and JH9. *TaVRN1* expression level was normalized to *Tubulin*. The expression levels of *TaVRN1* in wild type JH9 at V0 (non-vernalized plant, grown in long day condition at 20°C over 5 days) are set as 1, relative fold change in transgenic plants with different cold exposure are shown (V4-35, grown in long day condition at 22°C over 4 days, then transferred to 4°C for 4 to 35 days, aboveground part of 15 seedlings per sample were collected at 4°C for RNA extracting). Two biological replicates were conducted; data are means  $\pm$  SD of 3 technical replicates.



## Supplementary Figure 9

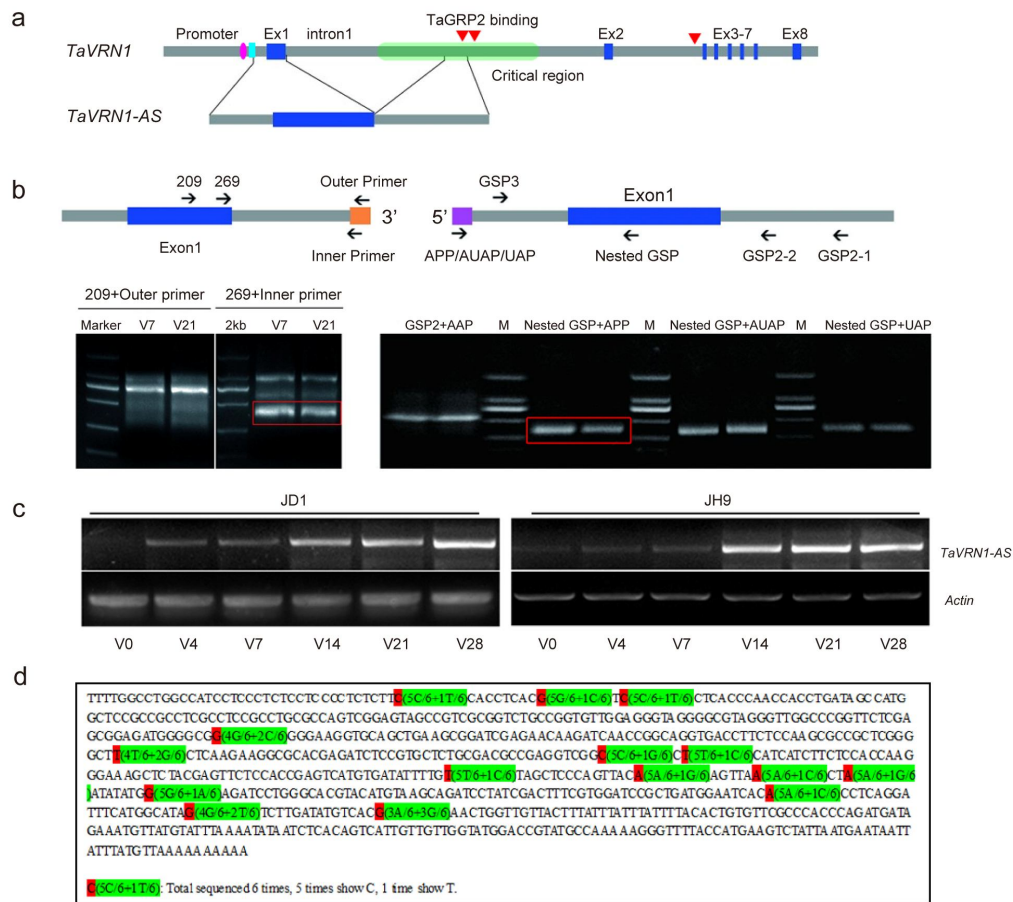

### Supplementary Fig. 9 Structure of *TaVRN1-AS* identified by RACE and its expression pattern in JD1 and JH9 during the course of vernalization

(a) Schematic diagram of the structure of the alternatively spliced *TaVRN1-AS* transcript, *TaVRN1* gene structure is indicated above. red triangles show the TaGRP2 binding sites; Magenta oval indicates the “VRN” box in the promoter; cyan box indicates the CARG box in the promoter; Ex1-8 mean exon1-8; green shade shows the “critical region” in the intron1. (b) 3’ RACE and 5’ RACE amplification of the *TaVRN1-AS* transcript. Primers used are indicated in the diagram. Orange box shows the 3’ adapter, purple box indicates the 5’ adapter. The band in the red square was sequenced. (c) Semi-RT-PCR quantification of *TaVRN1-AS* expression level in response to different cold exposure time, V0: non-vernalized, V3-V28: 4°C treatment for 3 days to 28 days as vernalization treatment. (d) Sequence information of *TaVRN1-AS*, highlights are those loci with multiply nucleotides by sequencing with individual clones as indicated.

**Supplementary Figure 10**

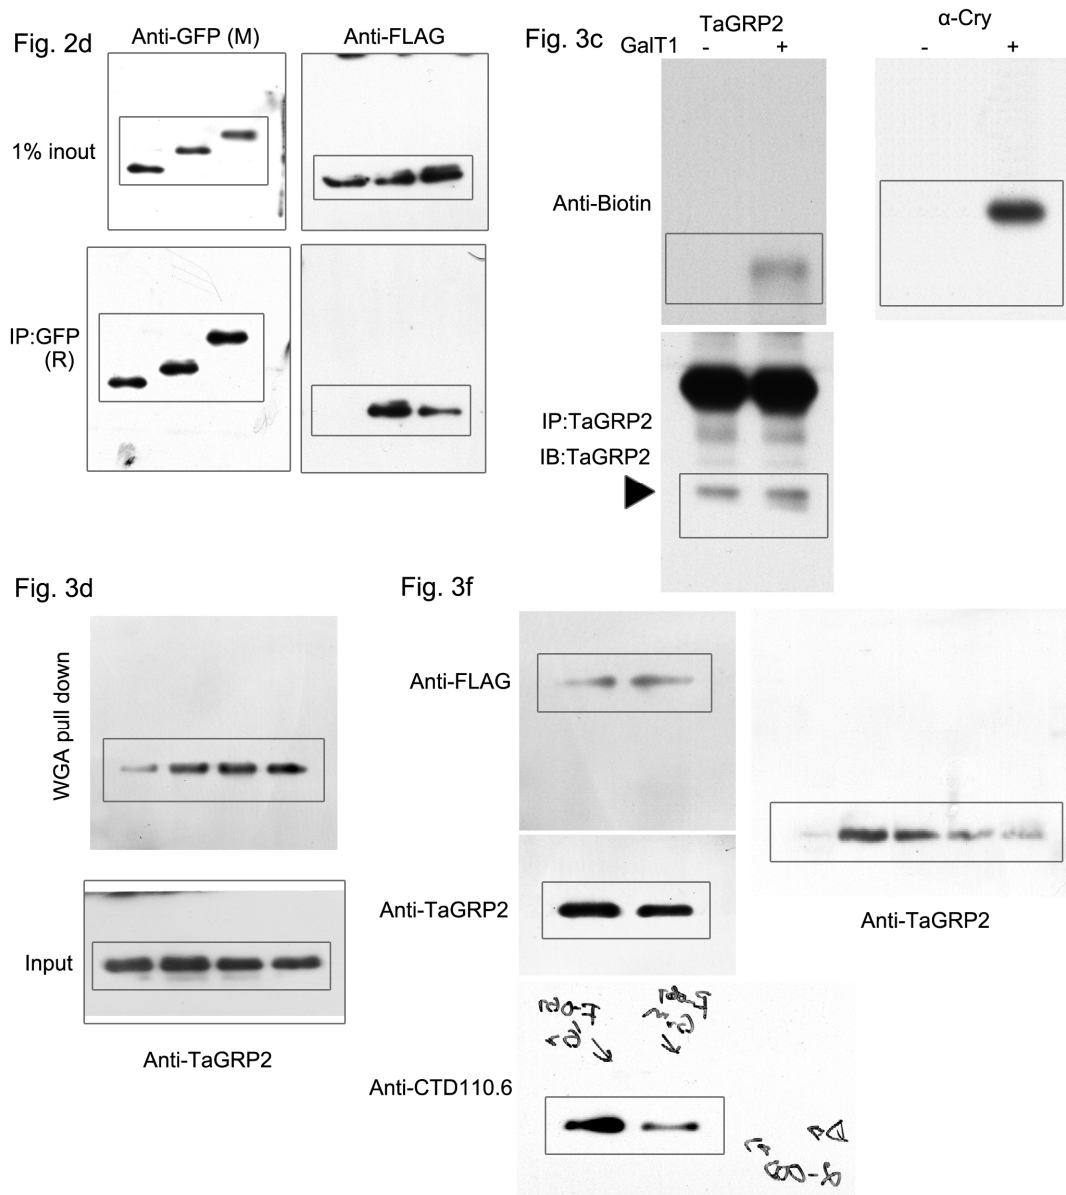

**Supplementary Fig. 10** Uncropped immunoblotting for main figures (Fig. 2d, 3c, 3d, 3f)

The cropped region of each blot was shown in square frame. M, mouse; R, rabbit.

### Supplementary Figure 11

Fig. 6a

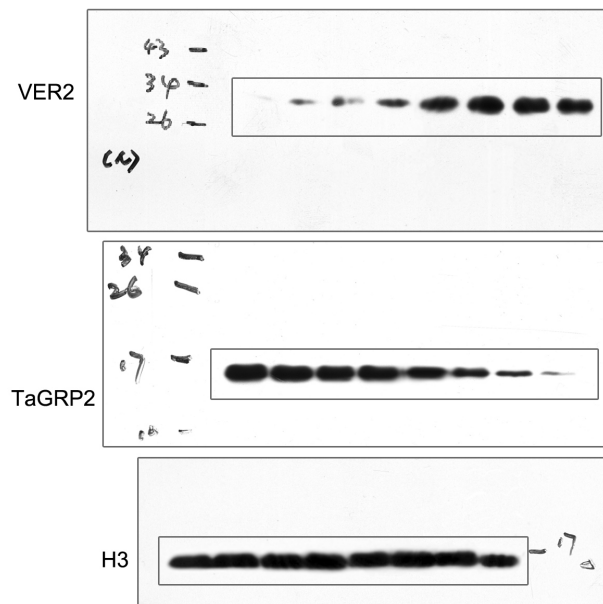

Fig. 6b

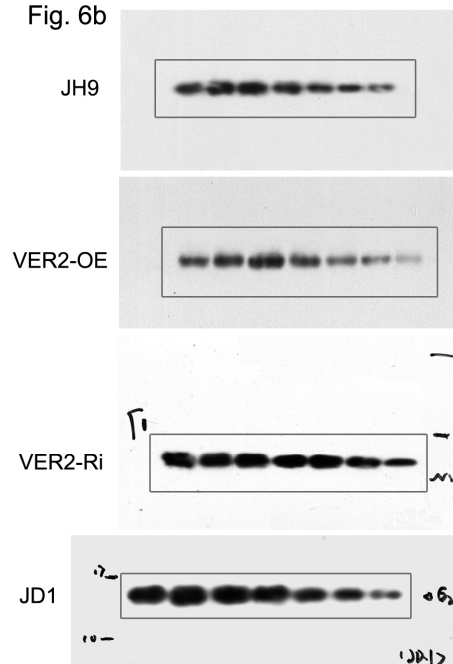

**Supplementary Fig. 11 Uncropped immunoblotting for main figures (Fig. 6a, 6b)**  
The cropped region of each blot was shown in square frame.

## Supplementary Tables

**Supplementary Table 1. Heading times (days) in different *VER2* transgenic plants**

| Flowering time(Day) | V0      | V10     | V20     | V30     |
|---------------------|---------|---------|---------|---------|
| JD1                 | 168±4.5 | 145±4.1 | 111±3.2 | 99±4.4  |
| JH9                 | 165±4.2 | 143±3.2 | 120±5.3 | 105±5.4 |
| <i>VER2</i> -OE-L1  | 134±4.5 | 117±2.5 | 107±3.4 | 97±2.3  |
| △Heading time       | 31      | 26      | 13      | 8       |
| <i>VER2</i> -OE-L2  | 133±4.2 | 115±3.6 | 109±4.2 | 98±4.3  |
| △Heading time       | 32      | 28      | 11      | 7       |

Note: △Heading time represents the difference between *VER2*-OE-L1/L2 and JH9. Data are means ± SD of 30 plants for each line.

**Supplementary Table 2. Potential candidates identified by MS for interacting with *VER2* during vernalization.**

| Reference | Annotation                                         | Score | MW     | Coverage |
|-----------|----------------------------------------------------|-------|--------|----------|
| VIP1      | Phosphoribulokinase                                | 90.22 | 44.4KD | 38.63%   |
| VIP2      | Glycine rich RNA binding protein                   | 80.4  | 16.2KD | 33.56%   |
| VIP3      | Thioglucoside glucohydrolase                       | 104.3 | 61.5KD | 57.98%   |
| VIP4      | Glyceraldehyde-3-phosphate dehydrogenase B subunit | 60.1  | 47.6KD | 22.58%   |
| VIP5      | Adenosine kinase                                   | 50.9  | 37.8KD | 16.83%   |
| VIP6      | Nuclear phosphoglycerate kinase                    | 80.2  | 50.1KD | 32.48%   |
| VIP7      | Intron maturase                                    | 48.2  | 62.5KD | 21.46%   |
| VIP8      | Glucose-6-phosphate isomerase                      | 45.6  | 62.3KD | 20.02%   |
| VIP9      | Alpha-glucan phosphorylase                         | 40.2  | 94.6KD | 11.23%   |

Note: The isolated peptides by Mass Spectrometry (MS) were searched by using Mascot online [http://www.matrixscience.com/cgi/search\\_form.pl?FORMVER=2&SEARCH=MIS](http://www.matrixscience.com/cgi/search_form.pl?FORMVER=2&SEARCH=MIS) from NCBI nr database (green plants).

**Supplementary Table 3. Heading times (days) in different *TaGRP2* transgenic plants**

| <b>Flowering time(Day)</b> | <b>V0</b> | <b>V10</b> | <b>V20</b> | <b>V30</b> |
|----------------------------|-----------|------------|------------|------------|
| JH9                        | 164±3.6   | 143±3.5    | 123±3.3    | 109±3.4    |
| <i>TaGRP2</i> -OE-L5       | 169±3.1   | 153±3.5    | 137±3.4    | 115±2.9    |
| △Heading time              | 5         | 10         | 14         | 6          |
| <i>TaGRP2</i> -OE-L16      | 167±4.2   | 149±3.8    | 133±3.2    | 113±3.3    |
| △Heading time              | 2         | 6          | 10         | 4          |
| <i>TaGRP2</i> -Ri-L2       | 157±3.2   | 129±4.1    | 115±3.6    | 105±3.4    |
| △Heading time              | 7         | 14         | 8          | 4          |
| <i>TaGRP2</i> -Ri-L15      | 157±3.5   | 128±3.4    | 112±3.7    | 103±2.8    |
| △Heading time              | 7         | 15         | 11         | 6          |

Note: △Heading time represents the difference between *TaGRP2*-OE-L5/L16, *TaGRP2* – Ri- L2/L15 and JH9. Data are mean ± SD of at least 30 plants for each line.

**Supplementary Table 4. Sequences of TaGRP2 binding RNA fragments screened by SELEX**

| Clone NO. | Sequences              | Length | Copies |
|-----------|------------------------|--------|--------|
| 1         | GCUUUGUUUUUCGCUCUUCU   | 20     | U      |
| 2         | UCCUUCGUUGCUCUUUUUUUU  | 21     | U      |
| 3         | UUCUUGUUUUUUCUGUUUCU   | 20     | U      |
| 4,5       | UUUUUUUUGUGUCGUCGGUG   | 20     | 2      |
| 6         | UUGUUAUCUUCUUGUGAUUU   | 20     | U      |
| 7         | UCGUCUGUUCGUUCUUCUUU   | 20     | U      |
| 8         | UUUUUUCGUUCUCUGUUUGU   | 20     | U      |
| 9         | UGUUUUUAUUGUGUCGCCGCG  | 20     | U      |
| 10        | UCCUUCGUUGCUCUUUUUUUU  | 21     | U      |
| 11        | UGUGUCUUCGAUUUGGGUUU   | 20     | U      |
| 12        | UCGUUUUUCUUUGUCCAUGG   | 20     | U      |
| 13        | UUUAUUCGUUUUCUGUCUCU   | 20     | U      |
| 14        | UAAUUUUCGUAUGCGGUCGU   | 20     | U      |
| 15        | UGUGUCUUCGAUUUGGGUUU   | 20     | U      |
| 16        | UAAUUGGAUGGUCUUUCUCU   | 20     | U      |
| 17        | UUCGUCUCUUUGUGGUCUGU   | 20     | U      |
| 18        | UUCGUCUCUUUGUGGUCUGU   | 20     | U      |
| 19        | UUUUUUUUGUGUCGUCGGUG   | 20     | U      |
| 20        | UCUUGUGUUUGCUUGUCCC    | 19     | U      |
| 21,22     | UUUUUUUCGUUUCUUUUGGU   | 20     | 2      |
| 23,24     | UGGUUUUUUUUUUCGUUGUC   | 20     | 2      |
| 25        | CUCGUUUUUUUUAUUCGUGGGU | 21     | U      |
| 26        | UUCAUGUUUCUUGUGUCCC    | 20     | 2      |
| 27        | UCCGUUUUGGUUGCCUGGGU   | 20     | U      |
| 28        | UUCUCCGUUGGGUUUGUUCG   | 20     | U      |
| 29        | UUUUUUCUCCCUUUUUGUCU   | 20     | U      |
| 30        | UGGUUUUCGGGUUUUUUACG   | 20     | U      |
| 31        | UUUUGUUUGUAGGGUUGGGU   | 20     | U      |
| 32        | GUGUUUUGGGGGUCUUUCUCC  | 21     | U      |
| 33        | GUUGUCGUCGUCGUUCUUC    | 19     | U      |

Note: U, unique.

**Supplementary Table 5. Prediction of TaGRP2 binding sites in TaVRN1**

| Start | End   | Motif sequence       | Gene structure            |
|-------|-------|----------------------|---------------------------|
| 1667  | 1686  | TTATTTTCTTTGCTCTCATT | Intron1 (Critical region) |
| 2176  | 2195  | CATGTGTTGTCGGTCTATTA | Intron1 (Critical region) |
| 2772  | 2790  | TTGTTGTTGGTATGGATCG  | Intron1 (Critical region) |
| 2879  | 2897  | TTTGTTCCTTTGTGCCTCC  | Intron1 (Critical region) |
| 6932  | 6951  | AATGCTTTGTTGTTGTTGTA | Intron 1                  |
| 8932  | 8950  | AATGGTTGTCGTGTTTCGTA | Intron 1                  |
| 11153 | 11171 | CAATTGTTATTGCTTGTGC  | Intron 2                  |

Note: The position is counted from ATG of the first exon of TaVRN1 gene.

**Supplementary Table 6. Sequences of all the primers used in this study**

| Description                                  | Name                   | Sequence                                                              |
|----------------------------------------------|------------------------|-----------------------------------------------------------------------|
|                                              | 209                    | TCAAGAAGGCGCACGAGAT                                                   |
|                                              | 269                    | CCACCAAGGGAAAGCTCTAC                                                  |
|                                              | 3'RACE Inner<br>Primer | CGCGGATCCGAATTAATACGACTCACT<br>ATAGG                                  |
| VRN1-alternative<br>splicing related primers | 3'RACE Outer<br>Primer | GCGAGCACAGAATTAATACGACT                                               |
|                                              | GSP3                   | GTTGGAGGCTTGGGGTGTA                                                   |
|                                              | GSP1                   | GGATGGGCAAAGCTCAAT                                                    |
|                                              | GSP2                   | GGAAGTCGATAGGATCTGCTTA                                                |
|                                              | Nested GSP             | GATCTCGTGCGCCTTCTT                                                    |
|                                              | VRN1 AS-F              | TTTTGGCCTGGCCATCCTCCCTCTC                                             |
|                                              | VRN1 AS-R              | TTGGCATACGATCCATACCAAC                                                |
|                                              | SA251                  | GCGTCTCTGCAGTAGTTA(N20)AGTCG<br>GCATCTTGGTACCCTATAGTGAGTCGT<br>ATTACC |
| SELEX primers                                | SA252                  | GGTAATACGACTCACTATAGGGTACCA<br>AGATGCCGACT                            |
|                                              | SA253                  | GCGTCTCTGCAGTAGTTA                                                    |
|                                              | VRN1-RIP-3<br>probe    | GUCAUUGUUGUUGGUAUGGAUCGUA<br>UG-Biotin                                |
| RNA-EMSA related<br>probes                   | M1                     | GUCAUUGUAGUAGAUUGGAUCGUAU<br>G-Biotin                                 |
|                                              | M2                     | GUCAUUGAUAAUAGAAUGGAUCGUAU<br>G-Biotin                                |
|                                              | competitor             | GUCAUUGUUGUUGGUAUGGAUCGUA<br>UG                                       |

|                                       |                            |                                                  |
|---------------------------------------|----------------------------|--------------------------------------------------|
| pUN1301-TaGRP2 construct              | TaGRP2-BamH I-F            | CGGGATCCATGGCGGACGTCGAGT                         |
|                                       | TaGRP2-KpnI-R              | GGGGTACCCTCCCTCCAGTTGCC                          |
| pTCK303-TaGRP2 construct              | TaGRP2-KpnI-SpeI-F         | GGGGTACCCTAGTGCTGCTTCGTCG<br>GCGGC               |
|                                       | TaGRP2-BamH-SacI-R         | CGGGATCCGAGCTCGGAACTCGCCGG<br>TGAGGT             |
| Point mutation of TaGRP2 (Thr 17 Ala) | TaGRP2-F(A49G)             | TCGCCTGGGCGCCGACGACCAG                           |
|                                       | TaGRP2-R(A49G)             | CTGGTCGTCCGGCGGCCAGGCGA                          |
| RIP related oligos                    | RNA-5'Adaptor              | CGACUGGAGCACGAGGACACUGACAU<br>GGACUGAAGGAGUAGAAA |
|                                       | GeneRacer dTprimer (SSIII) | GCTGTCAACGATACGCTACGTAACGGC<br>ATGACAGTG(T)24C   |
|                                       | GeneRacer 5'primer         | GCACGAGGACACTGACATGGACTGA                        |
|                                       | GeneRacer 5'nestprimer     | GGACACTGACATGGACTGAAGGAGTA                       |
|                                       | GeneRacer 3'primer         | GCTGTCAACGATACGCTACGTAACG                        |
|                                       | GeneRacer 3'nestprimer     | CGCTACGTAACGGCATGACAGTG                          |
|                                       | VRN1-RIP-1-F               | TGTTTCTGCGCTGTTTCAT                              |
|                                       | VRN1-RIP-1-R               | CGTGCTGTCTCATAGGCTCT                             |
|                                       | VRN1-RIP-2-F               | ACACGAAGTAAGCTGTTAGG                             |
|                                       | VRN1-RIP-2-R               | GGTGTAGAGGATAACTGGTTC                            |
|                                       | VRN1-RIP-3-F               | GCCCATCCAAGATGATAGAAATG                          |
|                                       | VRN1-RIP-3-R               | AGTTTGGTAAGATAAATGGTTGT                          |
|                                       | VRN1-RIP-4-F               | CGAGATTTTACGGGTTTCAG                             |
|                                       | VRN1-RIP-4-R               | TTCAATTTTGCCTTCCCAGA                             |
| VRN1-RIP-5-F                          | GGGCATTTATCTGCTTTGGC       |                                                  |
| VRN1-RIP-5-R                          | CCAACAATAGTTATCTAGGCAAG    |                                                  |
| VRN1-RIP-6-F                          | CTATTTGTAGCATTTCGTCAT      |                                                  |
| VRN1-RIP-6-R                          | TTGTCTCAACCTTCGCCTTC       |                                                  |
| VRN1-RIP-CK-F                         | CTTACCTTGCCTAGCACAAT       |                                                  |
| VRN1-RIP-CK-R                         | AGAAAGAGCACGAAACTGAC       |                                                  |
| VRN1-Q-F                              | AAGAAGGCGCACGAGATC         |                                                  |
| VRN1-Q-R                              | CCATCAGATGCTTTTGACATTT     |                                                  |
| VRN1-AS-Q-F                           | CGGTGTTGGAGGCTTGGGGTGTA    |                                                  |
| VRN1-AS-Q-R                           | GGGAGCTAGCAAAATATCACATGAC  |                                                  |



|                                                     |                    |                                        |
|-----------------------------------------------------|--------------------|----------------------------------------|
| Expression level analysis for realtime PCR          | TaGRP2-Q-F         | AACGCCTTCTCCAAGTACGG                   |
|                                                     | TaGRP2-Q-R         | TCCGACGCGAAGGTGAC                      |
|                                                     | TaVER2-Q-F         | CCACGGCTTGGCTACACTATA                  |
|                                                     | TaVER2-Q-R         | GCTTGTCTTAGTTTGTGTGTGTTGT              |
|                                                     | VRN2-Q-F           | CCGACACATGGCTCACCTAGTG                 |
|                                                     | VRN2-Q-R           | TTGCTTCATTGCTAATAGTGTTTGT              |
|                                                     | Tubulin-Q-F        | ATCTGGTGCGGGTAACAA                     |
|                                                     | Tubulin-Q-R        | AAGTGGAGGCGAGGGAAT                     |
| pET28a-TaGRP2,pGEX4T-1-TaGRP2,pGEX4T-1-TaGRP2(T17A) | TaGRP2-EcoRI-F     | CGGAATTCATGGCGGACGTGAGT                |
| FLAG-OGT construct                                  | TaGRP2-Sall-R      | GCGTCGACCTCCCTCCAGTTGCC                |
|                                                     | OGT-BamHI-F        | CGGGATCCATGGCGTCTTCCGTGGGC             |
|                                                     | OGT-KpnI-R         | GGGGTACCGGCTGACTCAGTACTTC              |
| pBI221-TaGRP2, pBI221-TaGRP2m(A49G)                 | TaGRP2-XbaI-F      | GCTCTAGAATGGCGGACGTGAGT                |
|                                                     | TaGRP2-KpnI-R      | GGGGTACCCTCCCTCCAGTTGCC                |
| pBI121/221-VER2;pRT105-3XFLAG-VER2 construct        | VER2-XbaI-F        | CGGGATCCATGGCCAAATTCCAGATT             |
|                                                     | VER2-KpnI-R        | GGGGTACCGACCGTGTAACACCAA               |
| pBI221-TaGRP2-RRM construct                         | TaGRP2-RRM-XbaI    | GCTCTAGAATGGCGTCCGGTGATGT              |
|                                                     | TaGRP2-RRM-KpnI    | GGGGTACCCTGAGCCTCGTTAACAGT             |
| pBI221-TaGRP2-GR(Glycine rich) construct            | TaGRP2-GR-XbaI     | GCTCTAGAATGTCACGAGGAAGCGGTG            |
|                                                     | TaGRP2-GR-KpnI     | GGGGTACCCCATCCTCCACCACCA               |
| 8OP-mini 35S::VER2 construct                        | VER2-BamHI-F       | CGGGATCCATGGCCAAATTCCAGATTACAC         |
|                                                     | VER2-StuI-R        | CCAGGCCTGACCGTGTAACACCAAATGC           |
| In situ hybridization                               | TaGRP2-sense-F     | TAATACGACTCACTATAGGGCGACGTCATCGACTCCA  |
|                                                     | TaGRP2-sense-R     | TCACTCCCTCCAGTTGCCGCCG                 |
|                                                     | TaGRP2-antisense-F | CGACGTCATCGACTCCAAGATCATC              |
|                                                     | TaGRP2-antisense-R | TAATACGACTCACTATAGGGTCACTCCCTCCAGTTGCC |
|                                                     | VRN1-ChIP-I-F      | GCTCTGCGACGCCGAG                       |
|                                                     | VRN1-ChIP-I-R      | TTAAAGACAGCGCGTGCTTAATT                |

|                                 |                            |                                         |
|---------------------------------|----------------------------|-----------------------------------------|
| ChIP primers (VRN1)             | VRN1-ChIP-II-F             | ATGCTCCGCCAGCGC                         |
|                                 | VRN1-ChIP-II-R             | ACCGTCCTAACCTTTCCACTTG                  |
|                                 | VRN1-ChIP-III-F            | GATTGCTTGGAGATACTGTCTACGG               |
|                                 | VRN1-ChIP-III-R            | TCATGCCGGAGTTTCATCG                     |
|                                 | VRN1-ChIP-IV-F             | CAAAGTTTGATCGGCTTACCTTC                 |
|                                 | VRN1-ChIP-IV-R             | GATTCTTACGCGTTTTTCATCACG                |
|                                 | VRN1-ChIP-V-F              | ATGCTCGACAGCGGCTATG                     |
|                                 | VRN1-ChIP-V-R              | AAACGAGGGTTCCGGCA                       |
| VER2 FISH probe fragment        | VER2-F                     | AACGGTGATGTGTTGGAGATTCT                 |
| pUC-SPYNE-VER2                  | VER2-R                     | CCGGGGCATAACACATGATTCATGC               |
|                                 | VER2-XbaI-F                | CGGGATCCATGGCCAAATTCCAGATT              |
| pUC-SPYCE-TaGRP2                | VER2-KpnI-R                | GGGGTACCGACCGTGTAACACCAA                |
|                                 | GRP2-XbaI-F                | GCTCTAGAATGGCGGACGTCGAGT                |
|                                 | GRP2-KpnI-R                | GGGGTACCCTCCCTCCAGTTGCC                 |
| 5' 3'-RACE                      | VRN1-GSP-outer-F           | TCAAGAAGGCGCACGAGAT                     |
|                                 | VRN1-GSP-inner-F           | CCACCAAGGGAAAGCTCTAC                    |
|                                 | VRN1-GSP-outer-R           | TGGATGGGCAAAGCTCAAT                     |
|                                 | VRN1-GSP-inner-R           | ATCCTGAGGGCGATTCCAT                     |
| Transgenic wheat identification | Bar-F                      | AAGCACGGTCAACTTCCGTA                    |
|                                 | Bar-R                      | GAAGTCCAGCTGCCAGAAAC                    |
|                                 | Ubi-F-w                    | GAGTATTTTGACAACAGGACTCTACAG             |
|                                 | Ubi-R-w                    | TGTGGAGGGGGTGTCTATTTATTAC               |
|                                 | Ubi-F                      | ATTATTTTGATCTTGATATACTTGGATG            |
|                                 | VER2-S-R                   | CGAAGCTCCCATGTGTTTC                     |
|                                 | VER2-AS-R                  | ACCCTCCAAATTCCCA                        |
|                                 | Ubi-F-Southern             | GTTTGTCTGGGTCATCTTT                     |
|                                 | Ubi-R-Southern             | CGTATGAAGGCAGGGCTA                      |
|                                 | GUS-P                      | GCG TCG ACC AAC GCT GAT CAA TTC<br>CACA |
|                                 | VER2-F                     | TAG AAT TCC ACA CCC AGC CAC TCA<br>CCC  |
| VER2-F 3'-3                     | CGATAGACCACTCACCTGC TTGTTC |                                         |

**Supplementary Table 7. Antibodies used in this study**

| Name                   | Host            | Antibody type | Company   | Dilution factor  | Description of the usage in this paper                                                              |
|------------------------|-----------------|---------------|-----------|------------------|-----------------------------------------------------------------------------------------------------|
| anti-H3                | Rabbit          | P             | Millipore | 1:10000          | Control for nucleus fraction and histone modification in immunoblotting and ChIP assay              |
| anti-H3K4me3           | Rabbit          | P             | Millipore | 1:5000           | histone modification analysis in ChIP assay                                                         |
| anti-H3K27me3          | Rabbit          | P             | Millipore | 1:2000           | histone modification analysis in ChIP assay                                                         |
| anti- $\beta$ -Tubulin | Mouse           | M             | Sigma     | 1:5000           | Marker for cytoplasm fraction in immunoblotting                                                     |
| anti-GFP               | Rabbit<br>Mouse | P/M           | Beyotime  | 1:2000<br>1:1000 | Analysis GFP tagged protein by immunoblotting in CoIP assay                                         |
| anti-FLAG              | Mouse           | M             | Sigma     | 1:2000           | Analysis FLAG tagged protein by immunoblotting in CoIP assay                                        |
| anti-VER2              | Rabbit          | P             | Ourself   | 1:1000           | Analysis of VER2 protein level by immunoblotting                                                    |
| anti-TaGRP2            | Mouse           | P             | Ourself   | 1:5000           | Analysis of TaGRP2 protein level by immunoblotting; Enrichment of TaGRP2 target RNA in RNA-IP assay |
| anti-GlcNAc (CTD110.6) | Mouse           | M             | CST       | 1:800            | Analysis of O-GlcNAcylation protein                                                                 |

Note: VER2 and GRP7 antibodies were generated by immunizing mouse with purified VER2 (without GST tag) and His-GRP7 protein respectively. The serum after immunizing was affinity purified. The specificity of antibodies was tested by using knockdown and overexpression transgenic lines. P: Polyclonal; M: Monoclonal.

## **Supplementary Methods**

### **DNA Probe Preparation and FISH analysis**

The seeds of JD1 and JH9 were germinated on moist filter paper in petri dishes. Actively growing roots were removed from seedlings and placed in gas treatment for 2 hour, fixed in 90% acetic acid and stored in 70% v/v ethanol. Chromosome spread preparation was carried out as previously described<sup>3</sup>. For FISH analysis, the detected gene (*VER2*) was labeled with Alexa Fluor-488-5-dUTP by a modified version of the nick translation method as previously described<sup>4</sup>. The FISH images were recorded using an epifluorescence Olympus BX61 microscope equipped with a cooled charge-coupled device camera operated with MetaMorph software and processed with Photoshop CS 2.0.

### **Sequential multicolor FISH analysis**

After rinsing the FISH hybridization probes signals, multicolor (mc)-FISH was carried out with two highly repeated DNA sequences pAs1<sup>5</sup> labeled with Alexa Fluor-594-5-dUTP and pSc119.2<sup>6</sup> labeled with Alexa Fluor-488-5-dUTP, respectively. Two probes were mixed at the ratio of 1: 1 before hybridization. The slides were counterstained with 4, 6-diamidino-2-phenylindole (DAPI). Detection and visualization were performed as described above. The individual chromosomes could be recognized by the different patterns of multicolor generated from these two repeated DNA probes.

### **Selective evolution of ligand by exponential enrichment**

Selective evolution of ligand by exponential enrichment SELEX was performed as described<sup>7,8</sup> with some modification. Briefly, the RNA library was reduced to 20 random nucleotides. The in vitro-transcribed RNA library was incubated with GST-TaGRP2 fusion proteins bound to glutathione Sepharose 4B resin to select for the binding RNA fragments. Then, the selected RNA fragments were reverse transcribed to DNA using adaptor primers. PCR amplification with specific primers was used to determine the proper number of cycles to distinguish sample and

negative controls. After that, PCR products were purified and used as template to generate the next round RNA library by *in vitro* transcription. The selection was repeated 6 times, and the final products were gel-purified, ligated into pGEM-T Easy vector (Promega) and sequenced.

### **5' Rapid Amplification of cDNA Ends (5' RACE)**

8.5 µg total RNA was treated with Turbo DNA-free DNaseI (Ambion) in a 10 µl reaction volume. 7 µl RNA sample was mixed with 0.25 µg GeneRacer RNA oligo (Invitrogen), heated at 65°C for 5 min and chilled on ice. Adaptor ligation was performed using T4 RNA ligase (Ambion) at 37°C for 1 hour. The RNA was then extracted by phenol: chloroform, precipitated, and re-suspended in 11 µl H<sub>2</sub>O. Reverse transcription was performed using GeneRacer oligo dT primer with Superscript reverse transcriptase (Invitrogen). GeneRacer 5' Primer and *VRN1-AS* specific anti-sense primer (Supplementary table 6) was used for PCR. PCR products were purified and sequenced.

## Supplementary References

1. Jia, J. *et al.* *Aegilops tauschii* draft genome sequence reveals a gene repertoire for wheat adaptation. *Nature* **496**, 91–95 (2013).
2. Schena, M., Lloyd, A. M. & Davis, R. W. A steroid-inducible gene expression system for plant cells. *Proc. Natl. Acad. Sci. USA* **88**, 10421–10425 (1991).
3. Han, F. P., Lamb, J. C. & Birchler, J. A. High frequency of centromere inactivation resulting in stable dicentric chromosomes of maize. *Proc. Natl. Acad. Sci. USA* **103**, 3238–3243 (2006).
4. Kato, A., Lamb, J. C. & Birchler, J. A. Chromosome painting using repetitive DNA sequences as probes for somatic chromosome identification in maize. *Proc. Natl. Acad. Sci. USA* **101**, 13554–13559 (2004).
5. Rayburn, A. L. & Gill, B. S. Isolation of a D-genome specific repeated DNA sequence from *Aegilops squarrosa*. *Plant Mol. Biol. Rep.* **4**, 102–109 (1986).
6. McIntyre, C. L., Pereira, S., Moran, L. B. & Appels, R. New *Secale cereale* (rye) DNA derivatives for the detection of rye chromosome segments in wheat. *Genome* **33**, 635–640 (1990).
7. Tuerk, C. & Gold, L. Systematic evolution of ligands by exponential enrichment: RNA ligands to bacteriophage T4 DNA polymerase. *Science* **249**, 505–510 (1990).
8. Kim, J. S. *et al.* Cold shock domain proteins and glycine-rich RNA-binding proteins from *Arabidopsis thaliana* can promote the cold adaptation process in *Escherichia coli*. *Nucleic Acids Res.* **35**, 506–516 (2007).
